# Supplementary material for: National Variation in Referral and Surgical Management of Incident Cervical Disc Herniation
Source: Research Square preprint supplement (doi:10.21203/rs.3.rs-7660573/v1), 2025-10-08
Supplement: Supplementary file 1 [file 005bdcb4831e680b272110d2.pdf]

## Supplementary

### Supplementary A – variable characteristics

Table 1 Variable characteristics

| Variables                                            | Type        | Subtype    | Categories                                                                                                                                                                                                                                                                | Codes                                                                                                                       |
|------------------------------------------------------|-------------|------------|---------------------------------------------------------------------------------------------------------------------------------------------------------------------------------------------------------------------------------------------------------------------------|-----------------------------------------------------------------------------------------------------------------------------|
| <b>Age</b>                                           | Numeric     | Continuous |                                                                                                                                                                                                                                                                           |                                                                                                                             |
| <b>Region of admission</b>                           | Categorical | Nominal    | Region of Zealand, and -Northern Jutland, Capitol-, Southern Denmark-, and Central Denmark Region                                                                                                                                                                         |                                                                                                                             |
| <b>Admission department</b>                          | Categorical | Nominal    | Emergency-, medical- and surgical department                                                                                                                                                                                                                              |                                                                                                                             |
| <b>Diagnosis</b>                                     | Categorical | Nominal    | Cervical disc herniation (CDH)<br><br>Any of following diagnoses used in hospital contacts <u>prior to</u> <u>diagnostication of cervical disc herniation</u> : panniculitis in the neck, radiculitis of no other specification (UNS), cervical neck pain, (ICD-10 codes) | DM50: Cervical disc herniation<br>DM540: panniculitis in the neck<br>DM541: radiculitis<br>UNS<br>DM542: Cervical neck pain |
| <b>Surgery</b>                                       | Categorical | Nominal    | Cervical surgery of Cervical disc herniation(-s) (SKS codes)                                                                                                                                                                                                              | KABC01<br>KABC10<br>KABC20<br>KABC21<br>KABC30<br>KABC50<br>KABC60<br>KABE50                                                |
| <b>Work capacity 1 year prior</b>                    | Numeric     | Continuous | (37hours/week reference)                                                                                                                                                                                                                                                  |                                                                                                                             |
| <b>Return-time to regained initial work capacity</b> | Categorical | Ordinal    | No change, 0.5, 1, 1.5, 2 years                                                                                                                                                                                                                                           |                                                                                                                             |

Supplementary B – Analysis of no-return and gained no previous work capacity according to type of department

|                                                          | Work Capacity 1 year prior to admission                       |      |      |           |                            |      |      |           |                                                           |      |      |           |
|----------------------------------------------------------|---------------------------------------------------------------|------|------|-----------|----------------------------|------|------|-----------|-----------------------------------------------------------|------|------|-----------|
|                                                          | Workers with <u>no</u> return of their previous work capacity |      |      |           |                            |      |      |           | Low baseline capacity improved >20% of a normal work week |      |      |           |
|                                                          | High work capacity                                            |      |      |           | Intermediate work capacity |      |      |           |                                                           |      |      |           |
|                                                          | Department at admission                                       |      |      |           | Department at admission    |      |      |           | Department at admission                                   |      |      |           |
|                                                          | ED                                                            | MD   | SD   | Total (n) | ED                         | MD   | SD   | Total (n) | ED                                                        | MD   | SD   | Total (n) |
| <b>Region of admission</b>                               |                                                               |      |      |           |                            |      |      |           |                                                           |      |      |           |
| Denmark                                                  | 46                                                            | 206  | 99   | ≤152      | -                          | 32   | 21   | ≤23       | 21                                                        | 83   | 83   | ≤81       |
| Capitol Region (per 10,000 of the admitted)*             | 124                                                           | 167  | 36   | 45        | -                          | -    | -    | -         | ≤22                                                       | 66   | ≤22  | ≤15       |
| Regions of Zealand (per 10,000 of the admitted)*         | ≤48                                                           | 416  | -    | ≤29       | -                          | 64   | -    | 4         | ≤48                                                       | 160  | ≤48  | ≤16       |
| Region of Southern Denmark (per 10,000 of the admitted)* | -                                                             | 267  | 100  | 33        | -                          | ≤33  | 33   | ≤6        | -                                                         | 122  | 100  | 20        |
| Region of Central Denmark (per 10,000 of the admitted)*  | -                                                             | 133  | 153  | 28        | -                          | 41   | 31   | 7         | ≤31                                                       | ≤31  | 112  | ≤17       |
| Region of Northern Denmark (per 10,000 of the admitted)* | -                                                             | ≤ 68 | 315  | ≤17       | -                          | ≤68  | 68   | ≤6        | -                                                         | ≤68  | 225  | ≤13       |
| Surgery rate in percent of admitted patients             | 9%                                                            | 2%   | 9%   | 17        | -                          | -    | ≤14% | ≤3        | -                                                         | 8%   | 12%  | 17        |
| Sustained work capacity (%)**                            |                                                               |      |      |           |                            |      |      |           |                                                           |      |      |           |
| Return within 0.5 years (%)**                            |                                                               |      |      |           |                            |      |      |           | 100%                                                      | 61%  | 69%  | ≤56       |
| Return within 1 years (%)**                              |                                                               |      |      |           |                            |      |      |           | 100%                                                      | ≤69% | ≤78% | ≤6        |
| Return within 1-1.5 years (%)**                          |                                                               |      |      |           |                            |      |      |           | 100%                                                      | 86%  | 100% | 14        |
| Return within 2 years (%)**                              |                                                               |      |      |           |                            |      |      |           | 100%                                                      | 100% | 100% | 5         |
| 2 years persistent loss of work capacity (%)**           | 100%                                                          | 100% | 100% | ≤152      | 0%                         | 100% | 100% | ≤23       |                                                           |      |      |           |

Observations ≤3 denoted "≤" accordingly // "Total (n)" indicates the absolute number of patients in Denmark/region.

\* Admission rate per 10,000 of the total CDH-admitted population in the Region

\*\* Intradepartmental cumulated return of work capacity. Percentages in outcome rows are calculated relative to the number admitted to the respective department type.

# Supplementary C – Analysis of surgical and no-surgical treatment groups according to type of department

|                                                          | Receiving surgery       |     |       |           | Not receiving surgery   |       |       |           |
|----------------------------------------------------------|-------------------------|-----|-------|-----------|-------------------------|-------|-------|-----------|
|                                                          | Department at admission |     |       |           | Department at admission |       |       |           |
|                                                          | ED                      | MD  | SD    | Total (n) | ED                      | MD    | SD    | Total (n) |
| <b>Region of admission</b>                               |                         |     |       |           |                         |       |       |           |
| Denmark                                                  | ≤220                    | 421 | 655   | ≤560      | ≤655                    | 5,629 | 2,418 | ≤3761     |
| Capitol Region (per 10,000 of the admitted)*             | 626                     | 116 | 51    | 109       | 1,790                   | 5,793 | 1,623 | 1,265     |
| Regions of Zealand (per 10,000 of the admitted)*         | ≤48                     | 624 | 176   | ≤53       | 256                     | 8,224 | 624   | 569       |
| Region of Southern Denmark (per 10,000 of the admitted)* | ≤33                     | 991 | 1,214 | ≤201      | 67                      | 6,626 | 1,080 | 698       |
| Region of Central Denmark (per 10,000 of the admitted)*  | ≤31                     | 265 | 663   | ≤94       | 122                     | 4,353 | 4,577 | 888       |
| Region of Northern Denmark (per 10,000 of the admitted)* | 0                       | 270 | 2,050 | 103       | ≤68                     | 2,275 | 5,338 | ≤341      |
| Sustained work capacity (%)**                            | 64%                     | 60% | 59%   | 338       | 57%                     | 48%   | 56%   | 1,915     |
| Return within 0.5 years (%)**                            | 78%                     | 75% | 78%   | 92        | 72%                     | 58%   | 69%   | 421       |
| Return within 1 years (%)**                              | ≤81%                    | 80% | 82%   | ≤24       | 76%                     | 61%   | 72%   | 110       |
| Return within 1-1.5 years (%)**                          | 81%                     | 83% | 85%   | 14        | 78%                     | 63%   | 74%   | 74        |
| Return within 2 years (%)**                              | 81%                     | 85% | ≤87%  | ≤8        | 78%                     | 63%   | 75%   | 20        |
| 2 years persistent loss of work capacity (%)**           | 19%                     | 15% | 13%   | 83        | 22%                     | 37%   | 25%   | 1,221     |

Observations ≤3 denoted "≤" accordingly // "Total (n)" indicates the absolute number of patients in Denmark/region.

\* Admission rate per 10,000 of the total CDH-admitted population in the Region

\*\* Intradepartmental cumulated return of work capacity. Percentages in outcome rows are calculated relative to the number admitted to the respective department type.
