# Supplementary material for: National Variation in Referral and Surgical Management of Incident Cervical Disc Herniation
Source: Research Square preprint supplement (doi:10.21203/rs.3.rs-7660573/v1), 2025-10-08
Supplement: Supplementary file 1 [file 0675a7f8e0560cd28f5475a8.xlsx]

## Sheet: Ark1
	Capitol Region	Region of Zealand	Region of Southern Denmark	Region of Central Jutland	Region of Northern Denmark	Percentage distribution (%)	Rate (n per 10,000)	Total (n)
General population aged 18-65 years (n) *	1159101	494021	733449	805270	357808			3549649
Total admission (n)	1374	625	898	981	444			≤4322
Admission per 10,000 of the general regional population aged 18-65 years*	12	13	12	12	12		≤12
First department at admission
Emergency department (intra-regional department distribution (%))	24.163	3.52	0.890869	1.42712	≤1	≤8.8		≤379
Medical department (intra-regional department distribution (%))	59.0975	88.48	76.1693	46.1774	25.4505	60.5044		2615
Surgical department (intra-regional department distribution (%))	16.7394	8	22.9399	52.3955	73.8739	30.7265		1328
Lumbar surgery rate per 10,000 admitted population **	793	848	2238	958	2320		1295.7	560
Emergency department (n per 10,000 in department) **	2590	≤1364	≤3750	≤2143	≤0		≤2507	≤95
Medical department (n per 10,000 in department) **	197	705	1301	574	1062		695.985	182
Surgical department (n per 10,000 in department) **	304	2200	5291	1265	2774		2131.02	283
Unspecific back pain diagnosis (ICD-10: DM54) prior to final diagnosis of cervical disc herniation (%)	5.60408	2.56	7.34967	3.16004	3.15315		472.004	204
* Regional admissions per 10,000 of the regional general population aged 18-65 years
** Regional surgery rate per 10,000 admitted in the department aged 18-65 years
Observation denoted "≤3" if observations (n) is ≤3 due to anonymisation
