# Supplementary material for: National Variation in Referral and Surgical Management of Incident Cervical Disc Herniation
Source: Research Square preprint supplement (doi:10.21203/rs.3.rs-7660573/v1), 2025-10-08
Supplement: Supplementary file 2 [file 76da2bc45e7ebdf5d12b9d7e.xlsx]

## Sheet: Ark1
	Work Capacity 1 year prior to admission	bep2	bep2		bep2	bep2	bep2	bep2		bep2	bep2	bep2	bep2		bep2
	Work Capacity ≥80%					Work Capacity [<80%;≥20%]					Work Capacity <20%
	High Work Capacity					Intermediate Work Capacity					Low Work Capacity
	Department at admission	department	department		department	Department at admission	department	department		department	Department at admission	department	department		department
	ED	MD	SD	Total (%)	n	ED	MD	SD	Total (%)	n	ED	MD	SD	Total (%)	n
First department at admission (Distribution in each Region of Denmark)
Denmark (%)	≤10%	0.568158	0.331599	0.667052	≤2883	≤8%	0.567823	≤35%	0.0733457	≤317	≤6%	0.710339	0.231729	0.259602	≤1122
Capitol Region (%)	0.325224	0.537772	0.137004	0.568413	781	0.354839	0.5	0.145161	0.0451237	62	0.105461	0.679849	0.214689	0.386463	531
Regions of Zealand (%)	0.0358744	0.88565	0.0784753	0.7136	446	≤5%	0.9	≤5%	0.096	≤60	≤3%	0.87395	0.10084	0.1904	≤119
Region of Southern Denmark (%)	0.00778816	0.739875	0.252336	0.714922	642	0	0.716667	0.283333	0.0668151	60	≤2%	0.846939	0.137755	0.218263	≤196
Region of Central Jutland (%)	0.0163205	0.397626	0.586053	0.687054	674	0	0.46988	0.53012	0.0846075	83	≤1%	0.651786	0.334821	0.228338	≤224
Region of Northern Denmark (%)	≤1%	0.235294	0.755882	0.765766	≤340	0	0.25	0.75	0.117117	52	0	0.384615	0.615385	0.117117	52
Surgery rate of admitted population aged 18-65 years (%)	0.252595	0.0811966	0.225941	0.146375	422	0.16	0.116667	0.294643	0.182965	58	0.2	0.0351317	0.130769	0.0668449	75
Total percentage of patients with return of their previous work capacity or gaining a work capacity ≥20% if previous low
Sustained work capacity (%)	0.724528	0.746603	0.745863	0.744096	1922	0.565217	0.575758	0.485714	0.542662	159	0	0	0	0	0
Return within 0.5 years (%)	0.871698	0.871603	0.880615	0.874564	337	0.869565	0.836364	0.809524	0.829352	84	0.0819672	0.0275689	0.0954198	0.0463872	52
Return within 1 years (%)	0.916981	0.913043	0.916076	0.914441	103	0.869565	0.89697	0.87619	0.887372	17	0.0819672	≤3%	≤11%	0.0517395	≤6
Return within 1-1.5 years (%)	0.932075	0.934103	0.943262	0.936895	58	≤100%	≤92%	0.914286	0.921502	≤10	0.0819672	0.0388471	0.137405	0.0642284	14
Return within 2 years (%)	0.932075	0.940897	0.949173	0.942702	15	1	0.939394	≤94%	0.945392	≤7	0.0819672	0.0451128	0.137405	0.0686887	5
2 years persistent loss of work capacity (%)	0.0679245	0.0591033	0.0508274	0.0572977	148	0	0.0606061	0.0571429	0.0546075	16	0.918033	0.954887	0.862595	0.931311	1044
Descriptive characteristics of the study population by high, intermediate, and low work capacity one year prior to admission. ED: Emergency department; MD: Medical department; SD: Surgical department. Subjects with missing information were excluded. Observations ≤3 denoted ”≤” accordingly . Total (%) indicates each group’s proportion of the national/regional population for admission rates, and th…

## Sheet: Ark2
Return to previous work degree	High Work Capacity	Intermediate Work Capacity	Low Work Capacity
Sustained initial work degree (%) *	0.744096	0.542662	0
Return within 0.5 years (%) *	0.874564	0.829352	0.0463872
Return within 1 year (%) *	0.914441	0.887372	0.0517395
Return within 1.5 years (%) *	0.936895	0.921502	0.0642284
Return within 2 years (%) *	0.942702	0.945392	0.0686887
